# Supplementary material for: Early Parenteral Administration of Ceftiofur has Gender-Specific Short- and Long-Term Effects on the Fecal Microbiota and Growth in Pigs from the Suckling to Growing Phase
Source: PubMed Central journal article supplement (PMC7022567; doi:10.3390/ani10010017), 2019-12-20
Supplement: animals-10-00017-s001.pdf [file animals-10-00017-s001.pdf]

**Supplementary Table 1.** Average daily weight gain (ADWG) in gram (g) in female (♀) and male (♂) pigs receiving either the antibiotic (AB) or control (Control) treatment between time periods days 0-12, day 0-28, day 0-97, day 12-28, day 28-75, day 28-97, day 75-97.

| Time period | ADWG g              |                     |                     |                   | SEM  |
|-------------|---------------------|---------------------|---------------------|-------------------|------|
|             | ♀                   |                     | ♂                   |                   |      |
|             | Control             | AB                  | Control             | AB                |      |
| day 0-12*   | 172                 | 166                 | 171                 | 170               | 6.7  |
| day 0-28**  | 243                 | 233                 | 237                 | 236               | 7.0  |
| day 0-97*   | 495                 | 478                 | 488                 | 507               | 14.8 |
| day 12-28** | 290                 | 278                 | 276                 | 277               | 8.8  |
| day 28-75*  | 499                 | 187                 | 475                 | 492               | 15.9 |
| day 28-97   | 592                 | 579                 | 586                 | 617               | 16.6 |
| day 75-97†  | 788 <sup>B ab</sup> | 772 <sup>AB b</sup> | 817 <sup>ABab</sup> | 879 <sup>Aa</sup> | 31.0 |

Data are presented as least-square means ± pooled standard error of the mean (SEM). <sup>A,B</sup> Different capital letters indicate a tendency (P<0.1); <sup>a,b</sup> Different lowercase letters indicate significant differences (P<0.05). \*\* Litter effect P<0.001; \* Litter effect P<0.05; † Sex effect P<0.05.

**Supplementary Table 2.** Permutational multivariate analysis of variance (**PERMANOVA**) results for ceftiofur effects on faecal microbiome.

| Source of Variation      | df  | SS    | R <sup>2</sup> | F       | <i>p</i> -value |
|--------------------------|-----|-------|----------------|---------|-----------------|
| Sow                      | 1   | 0.48  | 0.011          | 3.137   | 0.029           |
| Sex                      | 1   | 0.04  | 0.001          | 0.277   | 0.879           |
| Treatment                | 1   | 0.16  | 0.003          | 10.209  | 0.348           |
| Day                      | 1   | 16.73 | 0.003          | 110.034 | 0.001           |
| Sow: Sex                 | 1   | 0.04  | 0.001          | 0.251   | 0.896           |
| Sow: Treatment           | 1   | 0.14  | 0.003          | 0.887   | 0.400           |
| Sex: Treatment           | 1   | 0.03  | 0.001          | 0.162   | 0.954           |
| Sow: Day                 | 1   | 0.15  | 0.003          | 0.998   | 0.341           |
| Sex: Day                 | 1   | 0.03  | 0.001          | 0.216   | 0.941           |
| Treatment: Day           | 1   | 0.09  | 0.002          | 0.556   | 0.588           |
| Sow: Sex: Treatment      | 1   | 0.06  | 0.001          | 0.389   | 0.764           |
| Sow: Sex: Day            | 1   | 0.08  | 0.002          | 0.547   | 0.593           |
| Sow: Treatment: Day      | 1   | 0.08  | 0.002          | 0.513   | 0.656           |
| Sex: Treatment: Day      | 1   | 0.05  | 0.001          | 0.354   | 0.789           |
| Sow: Sex: Treatment: Day | 1   | 0.06  | 0.001          | 0.377   | 0.775           |
| Residual                 | 174 | 26.45 | 0.592          |         |                 |
| Total                    | 189 | 44.65 | 1.000          |         |                 |

The analysis based on pairwise distance of a multivariate data set and values were obtained using type III sums of squares with 999 permutations of residuals, considering significant difference at  $p < 0.05$ . df, degrees of freedom; SS, sum of squares.

**Supplementary Table 3.** Relative abundance (% of total reads) of bacterial phyla in female (♀) and male (♂) pigs receiving either the antibiotic (AB) or control (Control) treatment on days 0, 12, 28 and 97 of life.

|                           | day 0   |       |         |       |      | day 12              |                    |                    |                     |      |
|---------------------------|---------|-------|---------|-------|------|---------------------|--------------------|--------------------|---------------------|------|
|                           | ♀       |       | ♂       |       | SEM  | ♀                   |                    | ♂                  |                     | SEM  |
|                           | Control | AB    | Control | AB    |      | Control             | AB                 | Control            | AB                  |      |
| <i>Proteobacteria</i> **  | 83.75   | 87.26 | 88.50   | 87.03 | 5.17 | 57.85 <sup>AB</sup> | 69.02 <sup>A</sup> | 52.26 <sup>B</sup> | 57.45 <sup>AB</sup> | 6.95 |
| <i>Firmicutes</i> **      | 15.67   | 12.49 | 11.13   | 12.84 | 5.10 | 35.14 <sup>AB</sup> | 21.23 <sup>B</sup> | 39.34 <sup>A</sup> | 29.70 <sup>AB</sup> | 6.51 |
| <i>Actinobacteria</i> **  | 0.25    | 0.16  | 0.15    | 0.05  | 0.11 | 1.78 <sup>B</sup>   | 3.60 <sup>AB</sup> | 2.04 <sup>AB</sup> | 5.31 <sup>A</sup>   | 1.42 |
| <i>Bacteroidetes</i> **   | 0.07    | 0.02  | 0.09    | 0.01  | 1.29 | 0.44                | 0.13               | 1.11               | 0.41                | 1.34 |
| <i>Verrucomicrobia</i>    | 0.01    | 0     | 0.01    | 0     | 0.50 | 1.89 <sup>a</sup>   | 0.08 <sup>b</sup>  | 0.14 <sup>b</sup>  | 0.36 <sup>b</sup>   | 0.52 |
| <i>Archaea</i> ** †       | 0.09    | 0.02  | 0.05    | 0.01  | 0.33 | 0.32                | 0.34               | 0.52               | 0.66                | 0.35 |
| <i>Elusimicrobia</i> ** ✕ | 0       | 0     | 0       | 0     | 0.08 | 0.00                | 0.00               | 0.00               | 0.00                | 0.09 |
| <i>Tenericutes</i> ** ◇   | 0.05    | 0.01  | 0.05    | 0     | 0.09 | 0.09                | 0.01               | 0.16               | 0.16                | 0.09 |
| <i>Synergistetes</i> **   | 0.02    | 0     | 0       | 0.01  | 0.86 | 2.15                | 3.30               | 3.97               | 2.79                | 0.89 |
| Others                    | 0.10    | 0.03  | 0.03    | 0.05  | 0.30 | 0.21                | 0.12               | 0.47               | 1.02                | 0.31 |

  

|                           | day 28             |                    |                    |                    |      | day 97             |                    |                     |                     |      |
|---------------------------|--------------------|--------------------|--------------------|--------------------|------|--------------------|--------------------|---------------------|---------------------|------|
|                           | ♀                  |                    | ♂                  |                    | SEM  | ♀                  |                    | ♂                   |                     | SEM  |
|                           | Control            | AB                 | Control            | AB                 |      | Control            | AB                 | Control             | AB                  |      |
| <i>Proteobacteria</i> **  | 10.12              | 4.47               | 8.43               | 8.47               | 2.54 | 16.45 <sup>B</sup> | 28.94 <sup>A</sup> | 23.28 <sup>AB</sup> | 23.02 <sup>AB</sup> | 4.54 |
| <i>Firmicutes</i> **      | 73.78              | 79.08              | 72.63              | 73.74              | 4.79 | 73.88              | 65.96              | 65.55               | 69.78               | 5.06 |
| <i>Actinobacteria</i> **  | 0.66               | 0.46               | 0.41               | 0.49               | 0.20 | 0.48               | 0.45               | 0.46                | 0.52                | 0.06 |
| <i>Bacteroidetes</i> **   | 8.83 <sup>AB</sup> | 7.53 <sup>AB</sup> | 5.74 <sup>B</sup>  | 10.34 <sup>A</sup> | 1.83 | 3.47 <sup>AB</sup> | 2.06 <sup>B</sup>  | 7.15 <sup>A</sup>   | 2.84 <sup>B</sup>   | 1.83 |
| <i>Verrucomicrobia</i>    | 0.33               | 0.53               | 1.80               | 1.33               | 0.71 | 0.30               | 0.14               | 0.10                | 0.14                | 0.71 |
| <i>Archaea</i> ** †       | 3.44 <sup>AB</sup> | 2.45 <sup>B</sup>  | 3.65 <sup>A</sup>  | 2.74 <sup>AB</sup> | 0.48 | 2.38 <sup>a</sup>  | 0.98 <sup>b</sup>  | 1.52 <sup>ab</sup>  | 1.32 <sup>ab</sup>  | 0.48 |
| <i>Elusimicrobia</i> ** ✕ | 0.26 <sup>b</sup>  | 0.07 <sup>b</sup>  | 0.77 <sup>a</sup>  | 0.31 <sup>b</sup>  | 0.12 | 0.10               | 0.02               | 0.07                | 0.11                | 0.12 |
| <i>Tenericutes</i> ** ◇   | 0.35 <sup>b</sup>  | 0.88 <sup>a</sup>  | 0.63 <sup>ab</sup> | 0.42 <sup>b</sup>  | 0.13 | 2.14 <sup>a</sup>  | 1.42 <sup>b</sup>  | 1.61 <sup>b</sup>   | 1.89 <sup>b</sup>   | 0.13 |
| <i>Synergistetes</i> **   | 1.96               | 2.77               | 3.70               | 1.55               | 1.23 | 0.10               | 0.12               | 0.17                | 0.06                | 1.23 |
| Others                    | 0.56               | 1.03               | 0.69               | 1.20               | 0.76 | 1.49               | 0.60               | 0.68                | 0.70                | 0.49 |

Data are presented as least-square means ± pooled standard error of the mean (SEM). <sup>A,B</sup> Different capital letters indicate a tendency (P<0.1); <sup>a,b</sup> Different lowercase letters indicate significant differences (P<0.05). \*\* Day effect P<0.001; ✕ Sex effect P<0.05; † Treatment effect P<0.05; ◇ Day\*Sex\*Treatment effect P<0.05.

**Supplementary Table 4.** Relative abundance (% of total reads) of bacterial families in female (♀) and male (♂) pigs receiving either the antibiotic (AB) or control (Control) treatment on days 0, 12, 28 and 97 of life.

|                                        | day 0   |       |         |       |      | day 12                |                      |                       |                        |      |
|----------------------------------------|---------|-------|---------|-------|------|-----------------------|----------------------|-----------------------|------------------------|------|
|                                        | ♀       |       | ♂       |       | SEM  | ♀                     |                      | ♂                     |                        | SEM  |
|                                        | Control | AB    | Control | AB    |      | Control               | AB                   | Control               | AB                     |      |
| <i>Enterobacteriaceae</i> **           | 79.92   | 85.15 | 82.66   | 85.25 | 5.35 | 52.56 <sup>B ab</sup> | 65.46 <sup>A a</sup> | 44.09 <sup>AB b</sup> | 54.46 <sup>AB ab</sup> | 5.35 |
| <i>Clostridiaceae</i> *                | 12.64   | 11.31 | 8.42    | 7.24  | 2.73 | 5.54                  | 3.40                 | 7.54                  | 2.81                   | 2.83 |
| <i>Ruminococcaceae</i> **              | 0.67    | 0.25  | 0.52    | 0.10  | 2.71 | 12.85                 | 10.61                | 14.05                 | 14.00                  | 2.80 |
| <i>Turicibacteraceae</i> **            | 0.59    | 0.08  | 0.12    | 0.07  | 0.22 | 0.09                  | 0.05                 | 0.06                  | 0.03                   | 0.23 |
| <i>unclassified Clostridiales</i> **   | 0.56    | 0.11  | 0.34    | 0.05  | 1.46 | 6.50 <sup>A</sup>     | 2.93 <sup>B b</sup>  | 7.29 <sup>AB a</sup>  | 7.39 <sup>AB a</sup>   | 1.46 |
| <i>Campylobacteriaceae</i> *           | 0.02    | 0     | 0.05    | 0     | 0.56 | 2.61 <sup>a</sup>     | 0.64 <sup>b</sup>    | 1.83 <sup>ab</sup>    | 0.77 <sup>b</sup>      | 0.56 |
| <i>BS_11</i> **                        | 0.04    | 0.02  | 0.04    | 0     | 1.23 | 0.02                  | 0                    | 0.06                  | 0                      | 1.23 |
| <i>Christensenellaceae</i> **          | 0.14    | 0.05  | 0.08    | 0.03  | 1.47 | 5.58 <sup>a</sup>     | 1.10 <sup>b</sup>    | 6.09 <sup>a</sup>     | 2.39 <sup>ab</sup>     | 1.47 |
| <i>Bifidobacteriaceae</i> **           | 0.02    | 0     | 0       | 0.01  | 0.30 | 0.54 <sup>B b</sup>   | 1.34 <sup>A ab</sup> | 1.44 <sup>AB a</sup>  | 1.25 <sup>AB ab</sup>  | 0.30 |
| <i>Coriobacteriaceae</i> *             | 0.02    | 0.02  | 0.02    | 0     | 0.64 | 0.69 <sup>AB b</sup>  | 1.48 <sup>B ab</sup> | 0.33 <sup>AB b</sup>  | 3.06 <sup>A a</sup>    | 0.64 |
| <i>unclassified Bacteroidales</i> ** † | 0.01    | 0     | 0.03    | 0     | 0.37 | 0.35                  | 0.07                 | 0.78                  | 0.38                   | 0.37 |
| <i>Lactobacillaceae</i> ** †           | 0.07    | 0.03  | 0.06    | 0.01  | 0.21 | 0.10                  | 0.14                 | 0.36                  | 0.20                   | 0.21 |
| <i>Streptococcaceae</i> ** ✕           | 0.14    | 0.06  | 0.10    | 0.03  | 0.06 | 0.02                  | 0.01                 | 0.01                  | 0.01                   | 0.06 |
| <i>Lachnospiraceae</i> **              | 0.04    | 0.01  | 0.05    | 0.02  | 0.17 | 1.69 <sup>a</sup>     | 0.96 <sup>b</sup>    | 0.94 <sup>b</sup>     | 0.57 <sup>b</sup>      | 0.17 |
| <i>Veillonellaceae</i> **              | 0.06    | 0.01  | 0.08    | 0.03  | 0.71 | 2.11                  | 1.49                 | 2.21                  | 1.64                   | 0.71 |
| <i>unclassified RF32</i> ** ✕ †        | 0       | 0     | 0.01    | 0     | 0.14 | 0                     | 0                    | 0                     | 0                      | 0.14 |
| <i>Desulfovibrionaceae</i> **          | 0.01    | 0     | 0.01    | 0     | 0.17 | 1.61 <sup>a</sup>     | 0.60 <sup>b</sup>    | 0.89 <sup>b</sup>     | 0.98 <sup>b</sup>      | 0.17 |
| <i>Helicobacteriaceae</i> *            | 0.09    | 0     | 0       | 0     | 0.40 | 0.10                  | 0.20                 | 0.11                  | 0.02                   | 0.40 |
| <i>Succinivibrionaceae</i> ** ◇        | 0.01    | 0.01  | 0.09    | 0     | 1.35 | 0                     | 0                    | 0                     | 0.01                   | 1.35 |
| <i>Synergistaceae</i> **               | 0.01    | 0     | 0       | 0.01  | 0.83 | 1.95                  | 3.27                 | 3.68                  | 2.67                   | 0.83 |
|                                        | day 28  |       |         |       |      | day 97                |                      |                       |                        |      |
|                                        | ♀       |       | ♂       |       | SEM  | ♀                     |                      | ♂                     |                        | SEM  |
|                                        | Control | AB    | Control | AB    |      | Control               | AB                   | Control               | AB                     |      |
| <i>Enterobacteriaceae</i> **           | 0       | 0.46  | 2.02    | 0.27  | 7.60 | 1.39                  | 0.75                 | 1.69                  | 0.74                   | 7.60 |
| <i>Clostridiaceae</i> *                | 6.18    | 8.85  | 10.83   | 4.67  | 3.89 | 12.94                 | 13.10                | 10.85                 | 15.40                  | 3.89 |

|                                        |                     |                     |                    |                    |      |                      |                      |                     |                      |      |
|----------------------------------------|---------------------|---------------------|--------------------|--------------------|------|----------------------|----------------------|---------------------|----------------------|------|
| <i>Ruminococcaceae</i> **              | 35.32               | 42.40               | 34.05              | 37.03              | 3.84 | 28.55                | 21.22                | 23.14               | 24.58                | 3.84 |
| <i>Turicibacteraceae</i> **            | 1.60 <sup>a</sup>   | 1.66 <sup>a</sup>   | 1.69 <sup>a</sup>  | 0.73 <sup>b</sup>  | 0.31 | 0.04                 | 0.05                 | 0.05                | 0.07                 | 0.31 |
| <i>unclassified Clostridiales</i> **   | 12.96 <sup>ab</sup> | 12.44 <sup>ab</sup> | 9.58 <sup>b</sup>  | 16.58 <sup>a</sup> | 2.04 | 15.08                | 12.45                | 13.03               | 12.47                | 2.04 |
| <i>Campylobacteriaceae</i> *           | 0.47                | 0.97                | 1.01               | 0.52               | 0.80 | 1.72 <sup>b</sup>    | 1.01 <sup>b</sup>    | 1.40 <sup>b</sup>   | 4.20 <sup>a</sup>    | 0.80 |
| <i>BS_11</i> **                        | 5.29 <sup>AB</sup>  | 6.37 <sup>AB</sup>  | 4.13 <sup>B</sup>  | 8.94 <sup>A</sup>  | 1.74 | 0.85 <sup>B ab</sup> | 0.14 <sup>AB b</sup> | 4.84 <sup>A a</sup> | 0.76 <sup>B ab</sup> | 1.74 |
| <i>Christensenellaceae</i> **          | 6.43 <sup>b</sup>   | 11.25 <sup>ab</sup> | 14.90 <sup>a</sup> | 13.03 <sup>a</sup> | 2.24 | 3.22                 | 1.84                 | 2.91                | 2.17                 | 2.09 |
| <i>Bifidobacteriaceae</i> **           | 0.03                | 0.03                | 0.01               | 0.01               | 0.43 | 0                    | 0                    | 0.02                | 0                    | 0.43 |
| <i>Coriobacteriaceae</i> *             | 0.54                | 0.28                | 0.28               | 0.31               | 0.91 | 0.47                 | 0.42                 | 0.43                | 0.45                 | 0.91 |
| <i>unclassified Bacteroidales</i> ** † | 3.37 <sup>a</sup>   | 0.92 <sup>b</sup>   | 1.44 <sup>b</sup>  | 1.24 <sup>b</sup>  | 0.53 | 2.18                 | 1.66                 | 1.99                | 1.91                 | 0.53 |
| <i>Lactobacillaceae</i> ** †           | 0.28                | 0.28                | 0.36               | 0.35               | 0.29 | 2.72 <sup>a</sup>    | 0.88 <sup>b</sup>    | 2.30 <sup>a</sup>   | 1.97 <sup>b</sup>    | 0.29 |
| <i>Streptococcaceae</i> ** ✕           | 0                   | 0.05                | 0.01               | 0.02               | 0.09 | 1.15 <sup>a</sup>    | 0.78 <sup>b</sup>    | 0.62 <sup>b</sup>   | 0.79 <sup>b</sup>    | 0.09 |
| <i>Lachnospiraceae</i> **              | 0.28                | 0.21                | 0.29               | 0.20               | 0.24 | 0.97                 | 0.75                 | 0.85                | 1.14                 | 0.24 |
| <i>Veillonellaceae</i> **              | 2.05                | 0.63                | 1.51               | 0.79               | 1.00 | 8.70 <sup>b</sup>    | 14.45 <sup>a</sup>   | 10.30 <sup>b</sup>  | 10.31 <sup>b</sup>   | 1.00 |
| <i>unclassified RF32</i> ** ✕ †        | 0.11                | 0.21                | 0.13               | 0.50               | 0.19 | 0.85 <sup>b</sup>    | 1.18 <sup>b</sup>    | 0.98 <sup>b</sup>   | 2.04 <sup>a</sup>    | 0.19 |
| <i>Desulfovibrionaceae</i> **          | 1.53                | 1.10                | 1.34               | 1.30               | 0.24 | 0.49                 | 0.37                 | 0.42                | 0.43                 | 0.24 |
| <i>Helicobacteriaceae</i> *            | 2.84 <sup>a</sup>   | 0.19 <sup>b</sup>   | 1.08 <sup>b</sup>  | 0.62 <sup>b</sup>  | 0.54 | 0.36                 | 0.23                 | 0.25                | 0.35                 | 0.54 |
| <i>Succinivibrionaceae</i> ** ◇        | 1.02                | 0.23                | 0.51               | 2.15               | 1.92 | 9.40 <sup>b</sup>    | 23.00 <sup>a</sup>   | 17.30 <sup>a</sup>  | 13.10 <sup>b</sup>   | 1.92 |
| <i>Synergistaceae</i> **               | 1.23                | 1.08                | 3.25               | 0.90               | 1.19 | 0                    | 0.01                 | 0.05                | 0                    | 1.19 |

Data are presented as least-square means ± pooled standard error of the mean (SEM). A,B Different capital letters indicate a tendency (P<0.1); a,b Different lowercase letters indicate significant differences (P<0.05). \*\* Day effect P<0.001; \* Day effect P<0.05; ✕ Sex effect P<0.05; † Treatment effect P<0.05; ◇ Day\*Sex\*Treatment effect P<0.05.

**Supplementary Table 5.** Relative abundance (% of total reads) of selected OTUs in female (♀) and male (♂) pigs receiving either the antibiotic (AB) or control (Control) treatment on days 0, 12, 28 and 97 of life.

|                                         |                 | day 0   |       |         |       |      | day 12                |                      |                       |                        |      |
|-----------------------------------------|-----------------|---------|-------|---------|-------|------|-----------------------|----------------------|-----------------------|------------------------|------|
|                                         |                 | ♀       |       | ♂       |       | SEM  | ♀                     |                      | ♂                     |                        | SEM  |
|                                         |                 | Control | AB    | Control | AB    |      | Control               | AB                   | Control               | AB                     |      |
| <i>unclassified Enterobacteriaceae</i>  | OTU 1 **        | 71.46   | 77.84 | 76.28   | 78.07 | 4.90 | 47.26 <sup>B ab</sup> | 59.91 <sup>A a</sup> | 40.10 <sup>AB b</sup> | 49.74 <sup>AB ab</sup> | 5.07 |
| <i>Clostridium perfringens</i>          | OTU 2 **        | 4.74    | 7.41  | 5.16    | 4.24  | 1.72 | 3.45                  | 1.82                 | 4.51                  | 1.39                   | 1.72 |
| <i>unclassified Ruminococcaceae</i>     | OTU 3 ** † ◇    | 0       | 0.14  | 0.07    | 0.01  | 1.47 | 0.96                  | 0.56                 | 1.23                  | 1.98                   | 1.52 |
| <i>unclassified Enterobacteriaceae</i>  | OTU 4 **        | 3.02    | 3.36  | 3.15    | 3.24  | 0.21 | 1.88 <sup>ab</sup>    | 2.36 <sup>a</sup>    | 1.54 <sup>b</sup>     | 2.02 <sup>ab</sup>     | 0.21 |
| <i>unclassified Clostridiaceae</i>      | OTU 5 **        | 1.09    | 0.21  | 0.29    | 0.13  | 0.74 | 0.04                  | 0.05                 | 0.03                  | 0                      | 0.74 |
| <i>Succinivibrio</i>                    | OTU 6 ** ◇      | 0       | 0.01  | 0.05    | 0     | 0.72 | 0                     | 0                    | 0                     | 0.01                   | 0.72 |
| <i>Succinivibrio</i>                    | OTU 8 ** ◇      | 0       | 0     | 0.05    | 0     | 0.58 | 0                     | 0                    | 0                     | 0                      | 0.60 |
| <i>Ruminococcus</i>                     | OTU 9 **        | 0       | 0.06  | 0       | 0     | 0.89 | 3.41                  | 3.09                 | 3.29                  | 3.86                   | 0.86 |
| <i>unclassified Christensenellaceae</i> | OTU 11 **       | 0       | 0.02  | 0.04    | 0.01  | 0.55 | 1.46                  | 1.57                 | 1.13                  | 0.57                   | 0.57 |
| <i>unclassified Christensenellaceae</i> | OTU 15 *        | 0       | 0.03  | 0       | 0     | 0.37 | 1.14                  | 0.44                 | 0.95                  | 0.30                   | 0.39 |
| <i>unclassified Clostridiales</i>       | OTU 18 *        | 0.06    | 0.03  | 0       | 0.01  | 0.41 | 0.73 <sup>B ab</sup>  | 0.26 <sup>AB b</sup> | 1.64 <sup>AB a</sup>  | 1.94 <sup>A a</sup>    | 0.41 |
| <i>Campylobacter</i>                    | OTU 19 **       | 0       | 0.01  | 0.03    | 0     | 0.64 | 2.30 <sup>A</sup>     | 2.06 <sup>AB</sup>   | 1.60 <sup>AB</sup>    | 0.62 <sup>B</sup>      | 0.64 |
| <i>unclassified Christensenellaceae</i> | OTU 22 **       | 0       | 0.03  | 0.01    | 0.01  | 0.60 | 0.30                  | 0.02                 | 0.12                  | 0                      | 0.62 |
| <i>unclassified Clostridiales</i>       | OTU 23 *        | 0.02    | 0.02  | 0       | 0     | 0.38 | 0.66 <sup>ab</sup>    | 0.12 <sup>b</sup>    | 0.63 <sup>ab</sup>    | 1.27 <sup>a</sup>      | 0.40 |
| <i>unclassified Ruminococcaceae</i>     | OTU 24 **       | 0.05    | 0     | 0       | 0     | 0.25 | 0.03                  | 0                    | 0                     | 0                      | 0.25 |
| <i>Turicibacter</i>                     | OTU 26 ** ✕     | 0.68    | 0.10  | 0.08    | 0.07  | 0.28 | 0.08                  | 0.05                 | 0.06                  | 0.03                   | 0.28 |
| <i>unclassified Bacteroidales</i>       | OTU 27 *        | 0       | 0.01  | 0.01    | 0     | 0.34 | 0.03                  | 0.03                 | 0.13                  | 0.15                   | 0.35 |
| <i>unclassified Ruminococcaceae</i>     | OTU 28 ** ✕     | 0       | 0.01  | 0       | 0     | 0.22 | 0.60                  | 0.19                 | 0.23                  | 0.10                   | 0.22 |
| <i>Anaerovibrio</i>                     | OTU 35 ** ✕ † ◇ | 0       | 0     | 0.02    | 0     | 0.12 | 0                     | 0                    | 0                     | 0                      | 0.12 |
| <i>Lactobacillus</i>                    | OTU 37 ** † ◇   | 0.04    | 0     | 0.02    | 0     | 0.17 | 0.01                  | 0.04                 | 0.05                  | 0.05                   | 0.17 |
| <i>Methanobrevibacter</i>               | OTU 40 ** †     | 0.04    | 0     | 0.02    | 0     | 0.20 | 0                     | 0                    | 0                     | 0.01                   | 0.21 |
| <i>unclassified Christensenellaceae</i> | OTU 45 ** †     | 0       | 0.01  | 0       | 0     | 0.22 | 0.24                  | 0.02                 | 0.08                  | 0                      | 0.22 |
| <i>unclassified Ruminococcaceae</i>     | OTU 46 * ✕      | 0       | 0.01  | 0       | 0     | 0.22 | 0.15                  | 0.02                 | 0.18                  | 0.18                   | 0.22 |
| <i>Campylobacter</i>                    | OTU 49 ** ✕ ◇   | 0       | 0.01  | 0.02    | 0     | 0.11 | 0                     | 0                    | 0.06                  | 0.01                   | 0.12 |
| <i>Anaerovibrio</i>                     | OTU 51 ** ✕ † ◇ | 0       | 0     | 0.02    | 0     | 0.08 | 0                     | 0                    | 0                     | 0                      | 0.08 |
| <i>Desulfovibrio</i>                    | OTU 52 ** ◇     | 0.02    | 0     | 0       | 0     | 0.07 | 0.75 <sup>AB a</sup>  | 0.14 <sup>B b</sup>  | 0.25 <sup>AB b</sup>  | 0.33 <sup>A b</sup>    | 0.08 |
| <i>unclassified Ruminococcaceae</i>     | OTU 56 **       | 0.09    | 0.04  | 0.01    | 0     | 0.10 | 0                     | 0                    | 0                     | 0                      | 0.10 |

|                                         |                  |      |      |      |      |      |                      |                     |                      |                      |      |
|-----------------------------------------|------------------|------|------|------|------|------|----------------------|---------------------|----------------------|----------------------|------|
| <i>Clostridium</i>                      | OTU 57 **        | 0.32 | 0.01 | 0.02 | 0    | 0.16 | 0                    | 0                   | 0                    | 0                    | 0.16 |
| <i>unclassified Christensenellaceae</i> | OTU 58 ** † ◇    | 0    | 0.01 | 0    | 0    | 0.13 | 0.08                 | 0.14                | 0.09                 | 0.01                 | 0.14 |
| <i>unclassified Clostridiales</i>       | OTU 62 **        | 0    | 0.03 | 0.01 | 0    | 0.09 | 0                    | 0                   | 0                    | 0                    | 0.09 |
| <i>Ruminococcus</i>                     | OTU 66 ** ✕      | 0    | 0.01 | 0.01 | 0    | 0.14 | 0                    | 0                   | 0.07                 | 0                    | 0.14 |
| <i>unclassified Clostridiales</i>       | OTU 71 ** ✕ † ◇  | 0.01 | 0    | 0.01 | 0    | 0.06 | 0                    | 0                   | 0                    | 0                    | 0.06 |
| <i>unclassified RF32</i>                | OTU 73 ** †      | 0    | 0    | 0.01 | 0    | 0.10 | 0                    | 0                   | 0                    | 0                    | 0.11 |
| <i>Streptococcus</i>                    | OTU 76 ** ✕      | 0.09 | 0.02 | 0.04 | 0    | 0.06 | 0.01                 | 0                   | 0                    | 0.01                 | 0.06 |
| <i>unclassified Clostridiaceae</i>      | OTU 77 **        | 0.14 | 0.01 | 0.03 | 0.02 | 0.08 | 0                    | 0.01                | 0                    | 0                    | 0.08 |
| <i>Helicobacter</i>                     | OTU 81 ** †      | 0.09 | 0    | 0    | 0    | 0.14 | 0                    | 0                   | 0.02                 | 0                    | 0.15 |
| <i>unclassified Ruminococcaceae</i>     | OTU 85 **        | 0.02 | 0    | 0.01 | 0    | 0.05 | 0.01                 | 0                   | 0.01                 | 0.01                 | 0.05 |
| <i>Pyramidobacter pisciolens</i>        | OTU 106 * † ◇    | 0    | 0    | 0.01 | 0    | 0.16 | 0.02                 | 0.01                | 0.01                 | 0.01                 | 0.17 |
| <i>unclassified Ruminococcaceae</i>     | OTU 117 ** †     | 0    | 0    | 0    | 0    | 0.05 | 0.31 <sup>AB a</sup> | 0.09 <sup>B b</sup> | 0.20 <sup>A ab</sup> | 0.15 <sup>AB b</sup> | 0.05 |
| <i>Lactobacillus</i>                    | OTU 118 ** †     | 0.01 | 0.01 | 0.02 | 0    | 0.05 | 0.02                 | 0.01                | 0.02                 | 0.02                 | 0.05 |
| <i>Ruminococcus flavefaciens</i>        | OTU 124 *        | 0    | 0.01 | 0.01 | 0    | 0.14 | 0                    | 0                   | 0                    | 0                    | 0.15 |
| <i>Ruminococcus</i>                     | OTU 174 ** ✕ † ◇ | 0    | 0    | 0    | 0    | 0.04 | 0                    | 0                   | 0                    | 0                    | 0.04 |

|                                         |              | day 28               |                      |                      |                       |      | day 97               |                      |                     |                      |      |
|-----------------------------------------|--------------|----------------------|----------------------|----------------------|-----------------------|------|----------------------|----------------------|---------------------|----------------------|------|
|                                         |              | ♀                    |                      | ♂                    |                       | SEM  | ♀                    |                      | ♂                   |                      | SEM  |
|                                         |              | Control              | AB                   | Control              | AB                    |      | Control              | AB                   | Control             | AB                   |      |
| <i>unclassified Enterobacteriaceae</i>  | OTU 1 **     | 0.01                 | 0.42                 | 1.73                 | 0.21                  | 6.96 | 1.29                 | 0.60                 | 1.47                | 0.68                 | 6.96 |
| <i>Clostridium perfringens</i>          | OTU 2 **     | 0                    | 0.21                 | 0.14                 | 0.01                  | 2.35 | 0.51                 | 0                    | 0.04                | 0.02                 | 2.35 |
| <i>unclassified Ruminococcaceae</i>     | OTU 3 ** † ◇ | 11.83 <sup>bc</sup>  | 21.53 <sup>a</sup>   | 7.79 <sup>bd</sup>   | 14.95 <sup>bc</sup>   | 2.09 | 1.07                 | 1.41                 | 1.51                | 1.30                 | 2.09 |
| <i>unclassified Enterobacteriaceae</i>  | OTU 4 **     | 0                    | 0                    | 0.05                 | 0.02                  | 0.29 | 0.05                 | 0.05                 | 0.08                | 0.02                 | 0.29 |
| <i>unclassified Clostridiaceae</i>      | OTU 5 **     | 1.62 <sup>AB</sup>   | 2.89 <sup>AB</sup>   | 3.27 <sup>A</sup>    | 0.52 <sup>B</sup>     | 1.05 | 6.65                 | 6.86                 | 6.70                | 8.66                 | 1.05 |
| <i>Succinivibrio</i>                    | OTU 6 ** ◇   | 0.53                 | 0.10                 | 0.24                 | 1.57                  | 1.02 | 4.49 <sup>AB b</sup> | 11.37 <sup>A a</sup> | 8.77 <sup>B a</sup> | 6.48 <sup>AB b</sup> | 1.02 |
| <i>Succinivibrio</i>                    | OTU 8 ** ◇   | 0.21                 | 0.10                 | 0.20                 | 0.46                  | 0.83 | 3.99 <sup>c</sup>    | 9.83 <sup>a</sup>    | 7.27 <sup>b</sup>   | 5.54 <sup>bc</sup>   | 0.83 |
| <i>Ruminococcus</i>                     | OTU 9 **     | 0                    | 0.31                 | 0.43                 | 0                     | 1.18 | 0.08                 | 0                    | 0                   | 0.02                 | 1.18 |
| <i>unclassified Christensenellaceae</i> | OTU 11 **    | 5.67 <sup>a</sup>    | 2.80 <sup>b</sup>    | 4.39 <sup>ab</sup>   | 4.04 <sup>ab</sup>    | 0.78 | 0                    | 0                    | 0                   | 0.02                 | 0.78 |
| <i>unclassified Christensenellaceae</i> | OTU 15 *     | 0.82 <sup>AB b</sup> | 1.16 <sup>AB b</sup> | 2.67 <sup>A a</sup>  | 1.39 <sup>B ab</sup>  | 0.53 | 0.65                 | 0.51                 | 0.37                | 0.42                 | 0.53 |
| <i>unclassified Clostridiales</i>       | OTU 18 *     | 1.78                 | 0.67                 | 0.97                 | 1.13                  | 0.59 | 0                    | 0                    | 0                   | 0                    | 0.59 |
| <i>Campylobacter</i>                    | OTU 19 **    | 0.08                 | 0.14                 | 0.03                 | 0.10                  | 0.91 | 0.01                 | 0                    | 0.01                | 0                    | 0.91 |
| <i>unclassified Christensenellaceae</i> | OTU 22 **    | 4.11 <sup>A a</sup>  | 0.77 <sup>AB b</sup> | 2.09 <sup>B ab</sup> | 2.59 <sup>AB ab</sup> | 0.85 | 0.26                 | 0.18                 | 0.27                | 0.12                 | 0.85 |

|                                         |                  |                      |                      |                      |                      |      |                      |                      |                     |                      |      |
|-----------------------------------------|------------------|----------------------|----------------------|----------------------|----------------------|------|----------------------|----------------------|---------------------|----------------------|------|
| <i>unclassified Clostridiales</i>       | OTU 23 *         | 1.24 <sup>ab</sup>   | 2.10 <sup>a</sup>    | 0.46 <sup>b</sup>    | 1.08 <sup>ab</sup>   | 0.54 | 0.13                 | 0.09                 | 0.08                | 0.16                 | 0.54 |
| <i>unclassified Ruminococcaceae</i>     | OTU 24 **        | 0.02                 | 0.36                 | 0.03                 | 0.17                 | 0.36 | 3.69 <sup>a</sup>    | 1.65 <sup>b</sup>    | 1.98 <sup>b</sup>   | 2.33 <sup>b</sup>    | 0.36 |
| <i>Turicibacter</i>                     | OTU 26 ** ♂      | 1.50 <sup>b</sup>    | 2.86 <sup>a</sup>    | 1.60 <sup>b</sup>    | 0.71 <sup>b</sup>    | 0.40 | 0.05                 | 0.05                 | 0.06                | 0.07                 | 0.40 |
| <i>unclassified Bacteroidales</i>       | OTU 27 *         | 2.63 <sup>a</sup>    | 0.25 <sup>b</sup>    | 0.68 <sup>b</sup>    | 0.46 <sup>b</sup>    | 0.48 | 1.01                 | 0.83                 | 1.05                | 0.87                 | 0.48 |
| <i>unclassified Ruminococcaceae</i>     | OTU 28 ** ♂      | 1.98 <sup>a</sup>    | 1.75 <sup>a</sup>    | 1.51 <sup>a</sup>    | 0.53 <sup>b</sup>    | 0.32 | 0.09                 | 0.09                 | 0.10                | 0.05                 | 0.32 |
| <i>Anaerovibrio</i>                     | OTU 35 ** ♂ + ◇  | 0.27                 | 0.02                 | 0.06                 | 0.05                 | 0.18 | 0.91 <sup>b</sup>    | 3.12 <sup>a</sup>    | 1.42 <sup>bc</sup>  | 1.20 <sup>bc</sup>   | 0.18 |
| <i>Lactobacillus</i>                    | OTU 37 ** † + ◇  | 0.12                 | 0.13                 | 0.17                 | 0.12                 | 0.23 | 1.85 <sup>a</sup>    | 0.50 <sup>b</sup>    | 2.15 <sup>a</sup>   | 1.30 <sup>ac</sup>   | 0.23 |
| <i>Methanobrevibacter</i>               | OTU 40 ** †      | 0.91                 | 0.91                 | 0.89                 | 0.28                 | 0.29 | 1.55 <sup>a</sup>    | 0.32 <sup>b</sup>    | 0.74 <sup>b</sup>   | 0.52 <sup>b</sup>    | 0.29 |
| <i>unclassified Christensenellaceae</i> | OTU 45 ** †      | 1.51 <sup>a</sup>    | 0.64 <sup>b</sup>    | 1.73 <sup>a</sup>    | 0.57 <sup>b</sup>    | 0.31 | 0.22                 | 0.15                 | 0.21                | 0.08                 | 0.31 |
| <i>unclassified Ruminococcaceae</i>     | OTU 46 * ♂       | 0.40 <sup>AB b</sup> | 0.46 <sup>B ab</sup> | 1.28 <sup>A a</sup>  | 1.39 <sup>AB a</sup> | 0.32 | 0.23                 | 0.20                 | 0.22                | 0.48                 | 0.32 |
| <i>Campylobacter</i>                    | OTU 49 ** ♂ ◇    | 0.01 <sup>AB b</sup> | 0.11 <sup>B ab</sup> | 0.50 <sup>A a</sup>  | 0.01 <sup>AB b</sup> | 0.16 | 0.91 <sup>b</sup>    | 0.62 <sup>b</sup>    | 0.80 <sup>b</sup>   | 1.83 <sup>a</sup>    | 0.16 |
| <i>Anaerovibrio</i>                     | OTU 51 ** ♂ + ◇  | 0.16                 | 0.01                 | 0.04                 | 0.04                 | 0.11 | 0.64 <sup>B b</sup>  | 2.02 <sup>AB a</sup> | 0.95 <sup>A b</sup> | 0.79 <sup>AB b</sup> | 0.11 |
| <i>Desulfovibrio</i>                    | OTU 52 ** ◇      | 0.40                 | 0.42                 | 0.43                 | 0.37                 | 0.11 | 0.13                 | 0.04                 | 0.03                | 0.06                 | 0.11 |
| <i>unclassified Ruminococcaceae</i>     | OTU 56 **        | 0.06                 | 0.37                 | 0.30                 | 0.28                 | 0.14 | 1.30 <sup>a</sup>    | 0.67 <sup>b</sup>    | 0.60 <sup>b</sup>   | 0.76 <sup>b</sup>    | 0.14 |
| <i>Clostridium</i>                      | OTU 57 **        | 0                    | 0.03                 | 0.11                 | 0                    | 0.22 | 0.92 <sup>A ab</sup> | 1.24 <sup>AB a</sup> | 0.30 <sup>B b</sup> | 1.31 <sup>AB a</sup> | 0.22 |
| <i>unclassified Christensenellaceae</i> | OTU 58 ** † + ◇  | 0.47 <sup>b</sup>    | 1.13 <sup>a</sup>    | 0.46 <sup>b</sup>    | 1.45 <sup>a</sup>    | 0.19 | 0.10                 | 0.04                 | 0.04                | 0.04                 | 0.19 |
| <i>unclassified Clostridiales</i>       | OTU 62 **        | 0.23 <sup>B b</sup>  | 0.92 <sup>AB a</sup> | 0.38 <sup>AB b</sup> | 0.56 <sup>A b</sup>  | 0.12 | 0.63                 | 0.50                 | 0.50                | 0.45                 | 0.12 |
| <i>Ruminococcus</i>                     | OTU 66 ** ♂      | 0.08 <sup>b</sup>    | 0.18 <sup>b</sup>    | 0.27 <sup>b</sup>    | 0.85 <sup>a</sup>    | 0.20 | 0.50                 | 0.45                 | 0.49                | 0.88                 | 0.20 |
| <i>unclassified Clostridiales</i>       | OTU 71 ** ♂ + ◇  | 0.01 <sup>b</sup>    | 0.26 <sup>a</sup>    | 0 <sup>b</sup>       | 0.01 <sup>b</sup>    | 0.09 | 0.66 <sup>b</sup>    | 1.19 <sup>a</sup>    | 0.62 <sup>b</sup>   | 0.76 <sup>b</sup>    | 0.09 |
| <i>unclassified RF32</i>                | OTU 73 ** †      | 0                    | 0.09                 | 0                    | 0                    | 0.14 | 0.51 <sup>b</sup>    | 1.09 <sup>a</sup>    | 0.56 <sup>b</sup>   | 1.19 <sup>a</sup>    | 0.14 |
| <i>Streptococcus</i>                    | OTU 76 ** ♂      | 0                    | 0                    | 0                    | 0                    | 0.08 | 1.02 <sup>a</sup>    | 0.70 <sup>b</sup>    | 0.54 <sup>b</sup>   | 0.69 <sup>b</sup>    | 0.08 |
| <i>unclassified Clostridiaceae</i>      | OTU 77 **        | 0.08                 | 0.03                 | 0.19                 | 0.21                 | 0.11 | 0.83 <sup>a</sup>    | 0.54 <sup>ab</sup>   | 0.31 <sup>b</sup>   | 0.62 <sup>a</sup>    | 0.11 |
| <i>Helicobacter</i>                     | OTU 81 ** †      | 0.98 <sup>a</sup>    | 0.11 <sup>c</sup>    | 0.70 <sup>ab</sup>   | 0.42 <sup>bc</sup>   | 0.20 | 0.19                 | 0.14                 | 0.14                | 0.18                 | 0.20 |
| <i>unclassified Ruminococcaceae</i>     | OTU 85 **        | 0.17 <sup>b</sup>    | 0.44 <sup>a</sup>    | 0.23 <sup>b</sup>    | 0.57 <sup>a</sup>    | 0.07 | 0.39                 | 0.32                 | 0.42                | 0.29                 | 0.07 |
| <i>Pyramidobacter piscolens</i>         | OTU 106 * † + ◇  | 0.21 <sup>b</sup>    | 1.48 <sup>a</sup>    | 0.08 <sup>b</sup>    | 0.40 <sup>b</sup>    | 0.23 | 0                    | 0                    | 0                   | 0                    | 0.23 |
| <i>unclassified Ruminococcaceae</i>     | OTU 117 ** †     | 0.18 <sup>ab</sup>   | 0.06 <sup>b</sup>    | 0.29 <sup>a</sup>    | 0.15 <sup>ab</sup>   | 0.07 | 0.02                 | 0                    | 0                   | 0                    | 0.07 |
| <i>Lactobacillus</i>                    | OTU 118 ** †     | 0.02                 | 0.04                 | 0.04                 | 0.01                 | 0.07 | 0.59 <sup>a</sup>    | 0.25 <sup>b</sup>    | 0.55 <sup>a</sup>   | 0.40 <sup>b</sup>    | 0.07 |
| <i>Ruminococcus flavefaciens</i>        | OTU 124 *        | 0.39 <sup>ab</sup>   | 0.15 <sup>b</sup>    | 1.04 <sup>a</sup>    | 0.04 <sup>b</sup>    | 0.20 | 0.07                 | 0.10                 | 0.12                | 0.04                 | 0.20 |
| <i>Ruminococcus</i>                     | OTU 174 ** ♂ + ◇ | 0                    | 0                    | 0                    | 0                    | 0.06 | 0.56 <sup>a</sup>    | 0.26 <sup>b</sup>    | 0.25 <sup>b</sup>   | 0.17 <sup>b</sup>    | 0.06 |

Data are presented as least-square means ± pooled standard error of the mean (SEM). <sup>A,B</sup> Different capital letters indicate a tendency (P<0.1); <sup>a,b</sup> Different lowercase letters indicate significant differences (P<0.05). \*\* Day effect P<0.001; \* Day effect P<0.05; ♂ Sex effect P<0.05; † Treatment effect P<0.05;

◇ Day\*Sex\*Treatment effect P<0.05.
